# Supplementary material for: Time Variability of C-Reactive Protein: Implications for Clinical Risk Stratification
Source: PubMed Central journal article supplement (PMC3620269; doi:10.1371/journal.pone.0060759), 2013-04-08
Supplement: pone.0060759.s001.pdf [file pone.0060759.s001.pdf]

## Statistical Appendix

Let  $X_{szdwm}$  represent the CRP value of subject  $s$  at observation time  $z$  on day  $d$  within week  $w$  during month  $m$ . Our five level hierarchical model can then be described as follows.

At the first level of the hierarchical model, we assume that CRP values within each individual follow a normal density within a given day, such that

$$X_{sz} \sim N(\mu_{sz}, \sigma_{sz}^2) ,$$

where  $\mu_{sz}$  represents the overall mean of subject  $s$  depending on covariates  $z$ , and  $\sigma_{sz}^2$  represents subject-to-subject variability after accounting for variance explained by the covariates.

In turn, since covariates ASA, BMI and sex entered into our final model,

$$\mu_{sz} = \alpha_s + \beta_{ASA} \times ASA_s + \beta_{BMI} \times BMI_s + \beta_{sex} \times sex_s$$

where  $ASA_s$ ,  $BMI_s$  and  $sex_s$  are the subject specific ASA, BMI and sex variables.

At the second level of our hierarchical model, we have

$$X_{szd} \sim N(\mu_{szd}, \sigma_{szd}^2) ,$$

where  $\mu_{szd}$  represents the mean of subject  $s$  on day  $d$ , and  $\sigma_{szd}^2$  represents the variance within subjects on day  $d$ .

At the third level of our hierarchical model, we have

$$X_{szdw} \sim N(\mu_{szdw}, \sigma_{szdw}^2) ,$$

where  $\mu_{szdw}$  represents the mean of subject  $s$  within week  $w$ , and  $\sigma_{szdw}^2$  represents the week-to-week variance within subjects.

At the fourth level of our model, we have

$$X_{szdwm} \sim N(\mu_{szdwm}, \sigma_{szdwm}^2) ,$$

where  $\mu_{szdwm}$  represents the mean of subject  $s$  within month  $m$ , and  $\sigma_{szdwm}^2$  represents the month-to-month within subject variance.

Finally, our model is rounded out by assuming low-information prior densities across all parameters. In particular,  $\alpha_s$  and all regression parameters  $\beta$

followed normal densities with zero means and large variances, and standard deviation parameters were uniformly distributed across a range that included all plausible values. We also ran a simpler model without regression covariates ASA, BMI and sex, and a somewhat more complex model that added a regression component to explain subject-to-subject differences in variance. This latter model also included ASA, BMI and sex as covariates.
